# Supplementary material
Source: MDPI journal article supplement (https://www.mdpi.com/1424-8247/16/3/431)
Supplement: s1 [file s1]

# A Safe-by-Design Approach for the Synthesis of a Novel Cross-linked Hyaluronic Acid with Improved Biological and Physical Properties

Sabrina Sciabica <sup>1,†</sup>, Riccardo Barbari <sup>1,†</sup>, Riccardo Fontana <sup>2</sup>, Giovanni Tafuro <sup>3</sup>, Alessandra Semenzato <sup>4</sup>, Daniela Traini <sup>5,6</sup>, Dina M. Silva <sup>6</sup>, Larissa Gomes Dos Reis <sup>6</sup>, Luisa Canilli <sup>7</sup>, Massimo Terno <sup>7</sup>, Peggy Marconi <sup>2</sup>, Anna Baldisserotto <sup>1,\*</sup>, Silvia Vertuani <sup>1,\*</sup> and Stefano Manfredini <sup>1</sup>

<sup>1</sup> Department of Life Sciences and Biotechnology, University of Ferrara, via L. Borsari 46, 44121 Ferrara, Italy

<sup>2</sup> Department of Chemical, Pharmaceutical and Agricultural Sciences, University of Ferrara, via Fossato di Mortara 64/B, 44121 Ferrara, Italy

<sup>3</sup> Unired Srl, via Niccolò Tommaseo 69, 35131 Padova, Italy

<sup>4</sup> Department of Pharmaceutical and Pharmacological Sciences, University of Padova, via Marzolo 5, 35131 Padova, Italy

<sup>5</sup> Macquarie Medical School, Faculty of Medicine, Health & Human Sciences, Macquarie University, Campus Macquarie Park, Sydney 2109, Australia

<sup>6</sup> Woolcock Institute of Medical Research, 431 Glebe Point Road, Glebe, Sydney 2037, Australia

<sup>7</sup> Istituto Ganassini S.p.a., Via Carlo Boncompagni, 63, 20139 Milano, Italy

\* Correspondence: bldnna@unife.it (A.B.); vrs@unife.it (S.V.); Tel.: +39-0532-455258 (A.B.); +39-0532-455294 (S.V.)

† These authors contributed equally to this work.

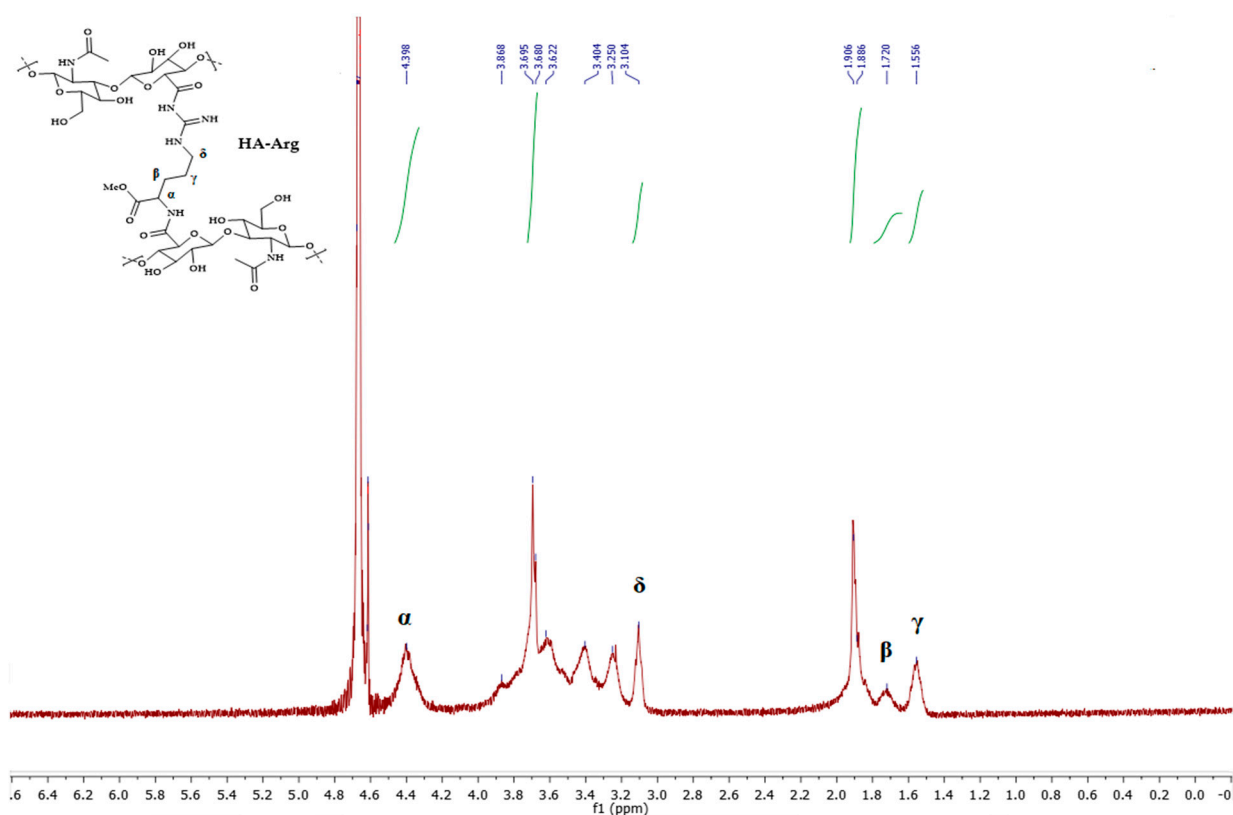

Figure S1. <sup>1</sup>H NMR spectra of cross-linked product HA-Arg.

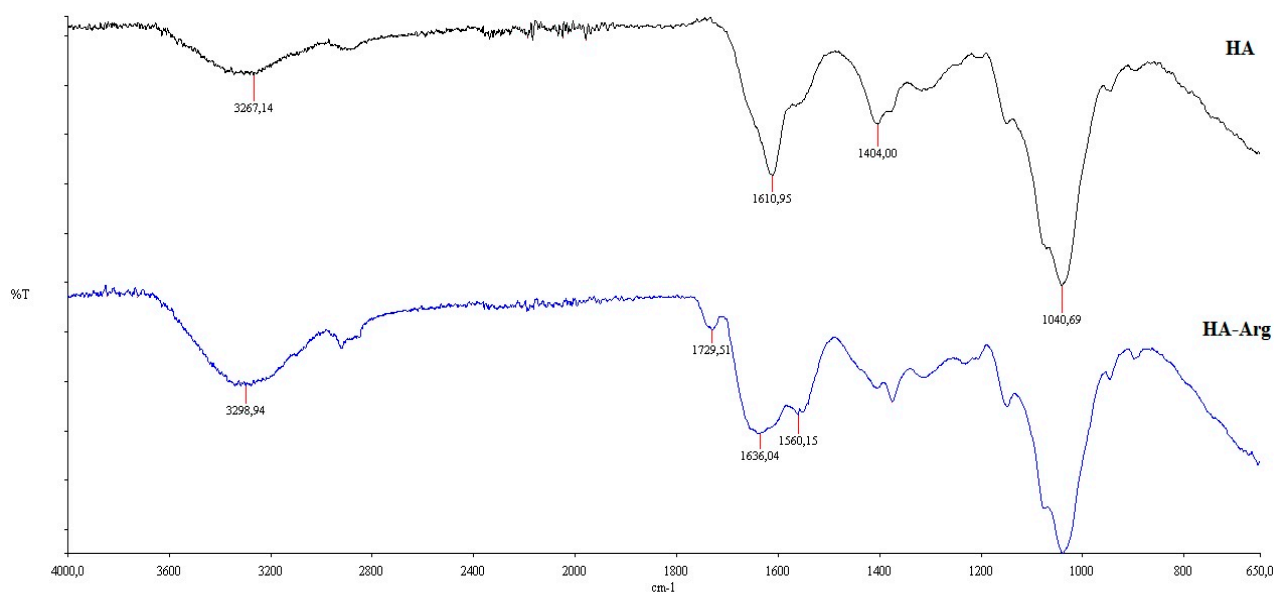

**Figure S2.** IR spectra of native HA and HA-Arg.

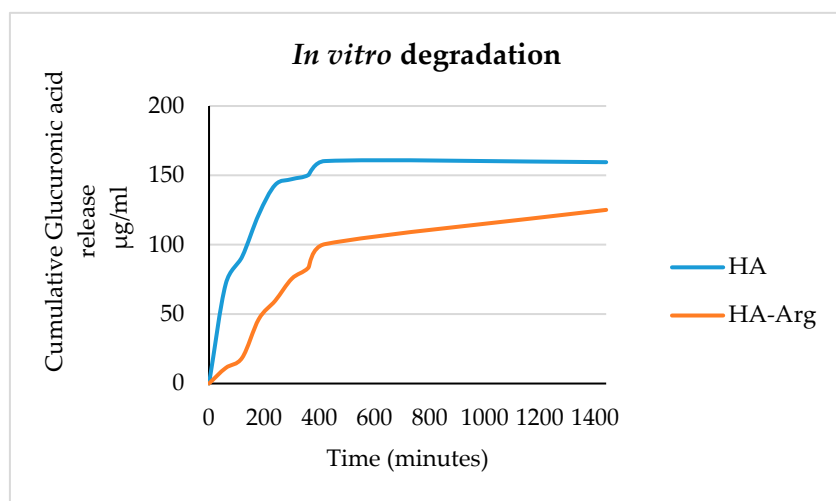

**Figure S3.** Glucuronic acid released from in vitro degradation of HA, and HA-Arg in PBS, pH 7.4 at 37 °C, with 50U/ml of hyaluronidase.
